# Supplementary material for: Regulation and Therapeutic Targeting of MTHFD2 and EZH2 in KRAS-Mutated Human Pulmonary Adenocarcinoma
Source: MDPI journal article supplement (doi:10.3390/metabo12070652), 2022-07-15
Supplement: s1 [file s1]

# Figure S1

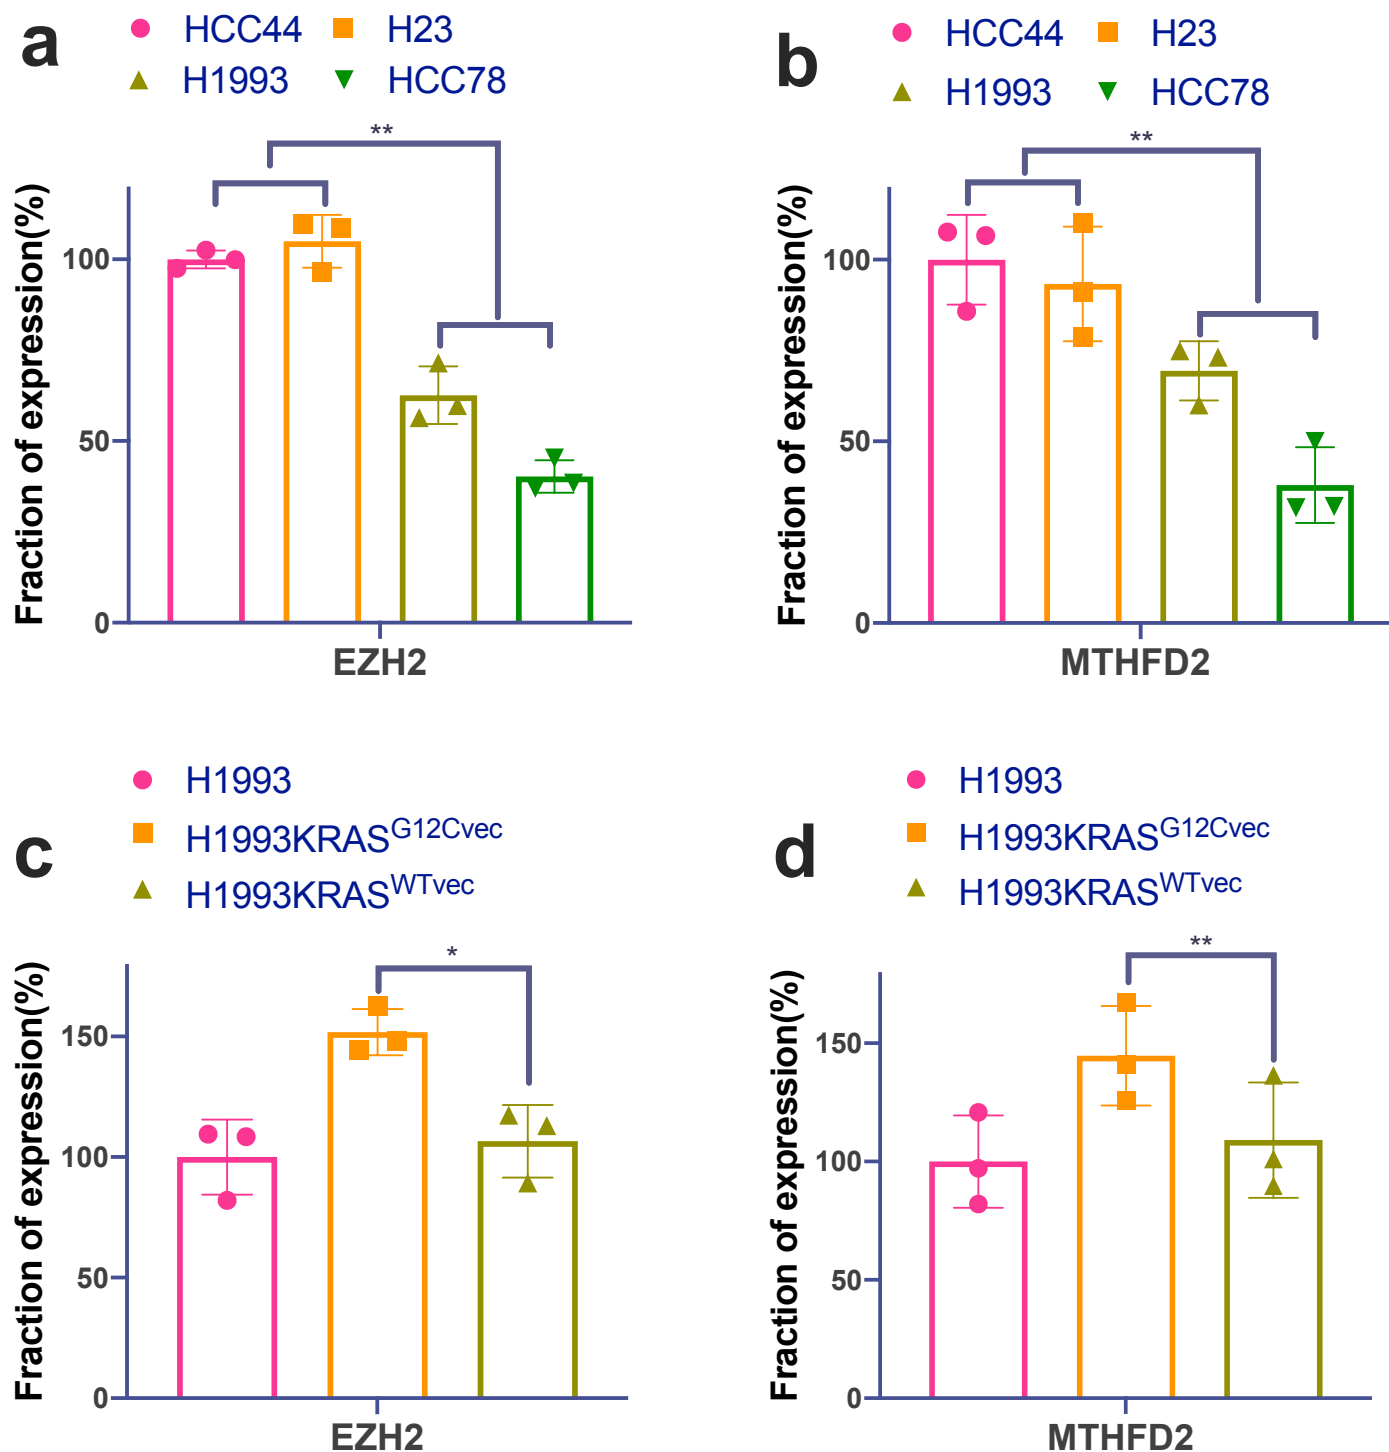

**Figure S1** Expression of EZH2 and MTHFD2 in the four AC cell lines HCC44, H23, H1993, and HCC78 and H1993 cells transfected with Kras<sup>G12Cvec</sup> or Kras<sup>WTvec</sup> plasmid. Quantification of EZH2 (**a**) and MTHFD2 (**b**) protein expression in the AC cell lines HCC44, H23, H1993, and HCC78. Quantification of EZH2 (**c**) and MTHFD2 (**d**) protein expression in H1993 cells transfected with Kras<sup>G12Cvec</sup> or Kras<sup>WTvec</sup> plasmid. GAPDH was used as loading control. Data is depicted as mean  $\pm$  SEM of three independent experiments.
