# Supplementary material for: Regulation and Therapeutic Targeting of MTHFD2 and EZH2 in KRAS-Mutated Human Pulmonary Adenocarcinoma
Source: MDPI journal article supplement (doi:10.3390/metabo12070652), 2022-07-15
Supplement: s1 [file s1]

# Figure S2

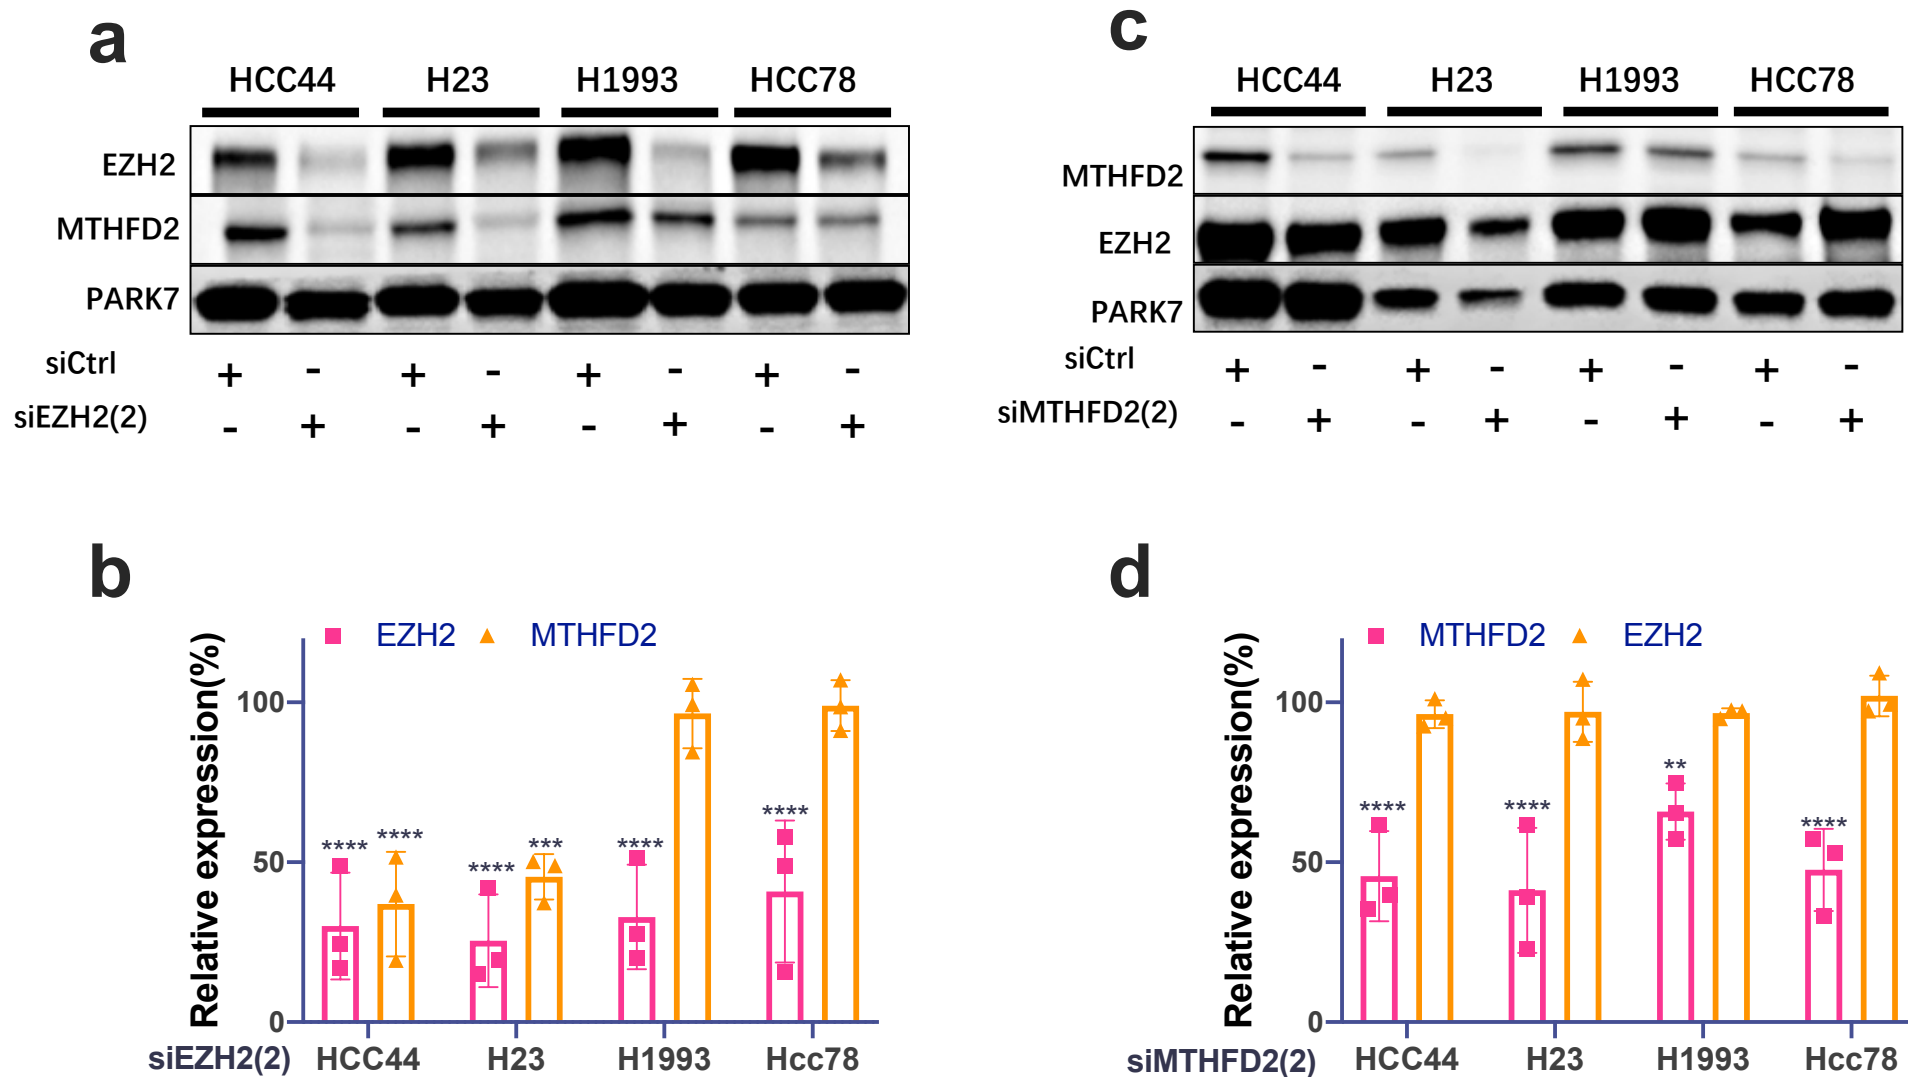

**Figure S2** (a) Western blot analysis of the four AC cell lines HCC44, H23, H1993, and HCC78 after EZH2 knockdown with siRNA(2). (b) Related quantification of EZH2 and MTHFD2 protein expression after EZH2 knockdown. (c) Western blot analysis after MTHFD2 knockdown with siRNA(2). (d) Related quantification of EZH2 and MTHFD2 protein expression after MTHFD2 knockdown. Data is depicted as mean  $\pm$  SEM of at three independent experiments.
